# Supplementary material
Source: MDPI journal article supplement (https://www.mdpi.com/2073-445X/11/7/966)
Supplement: s1 [file s1 › land-1747988-supplementary.pdf]

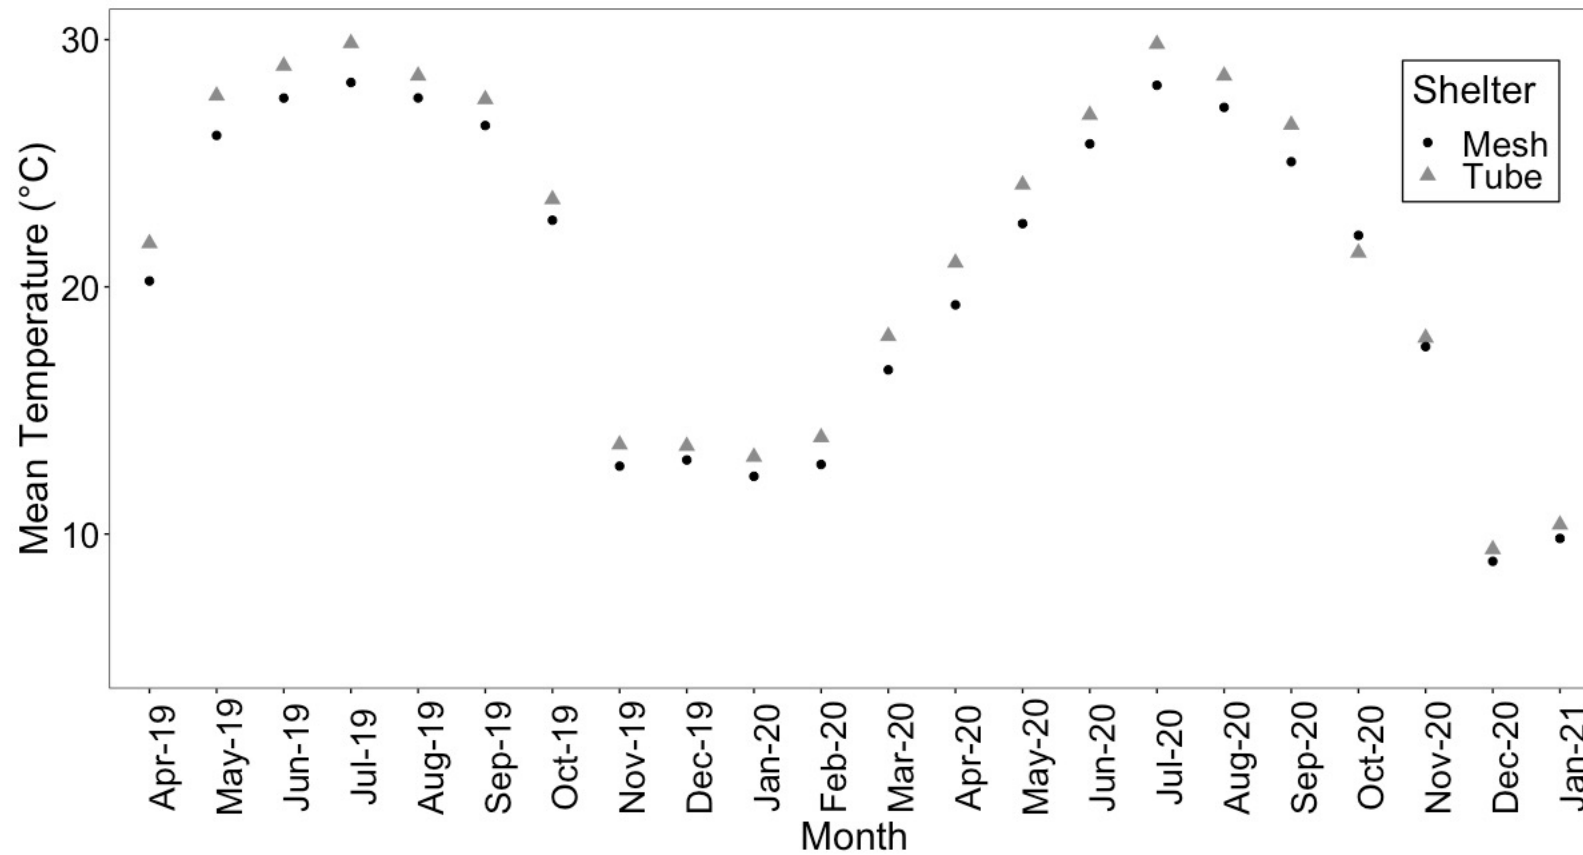

Figure S1. Mean air temperatures (°C) averaged by shelter treatment (mesh and tube shelters included) from April 2019 to January 2021. Air temperature was recorded every 15 min.

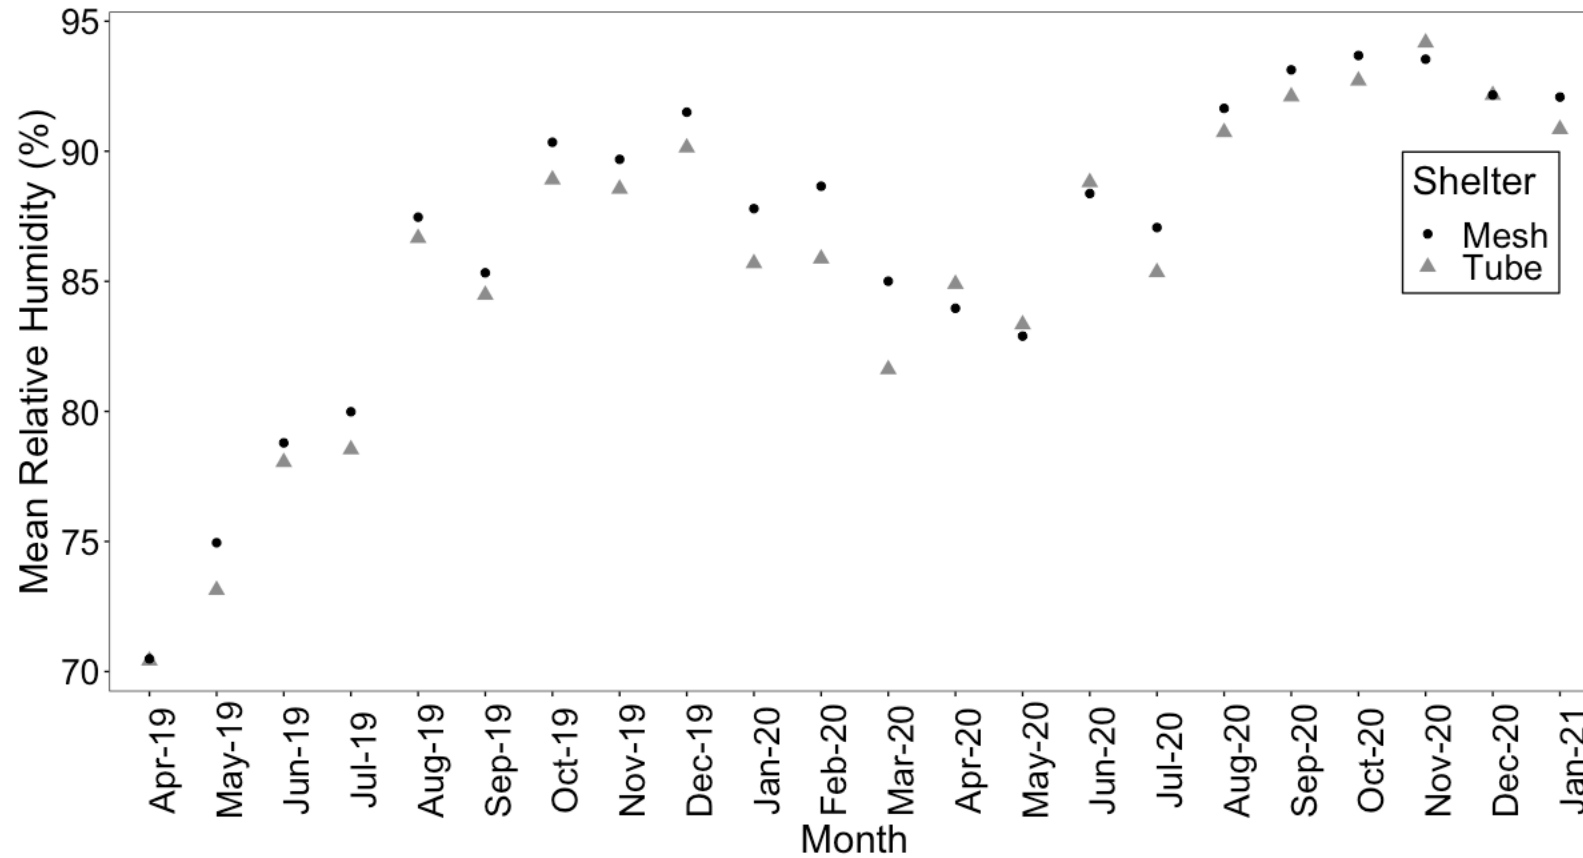

Figure S2. Mean percent relative humidity (%) averaged by shelter treatment (mesh and tube shelters included) from April 2019 to January 2021. Relative humidity was recorded every 15 min.

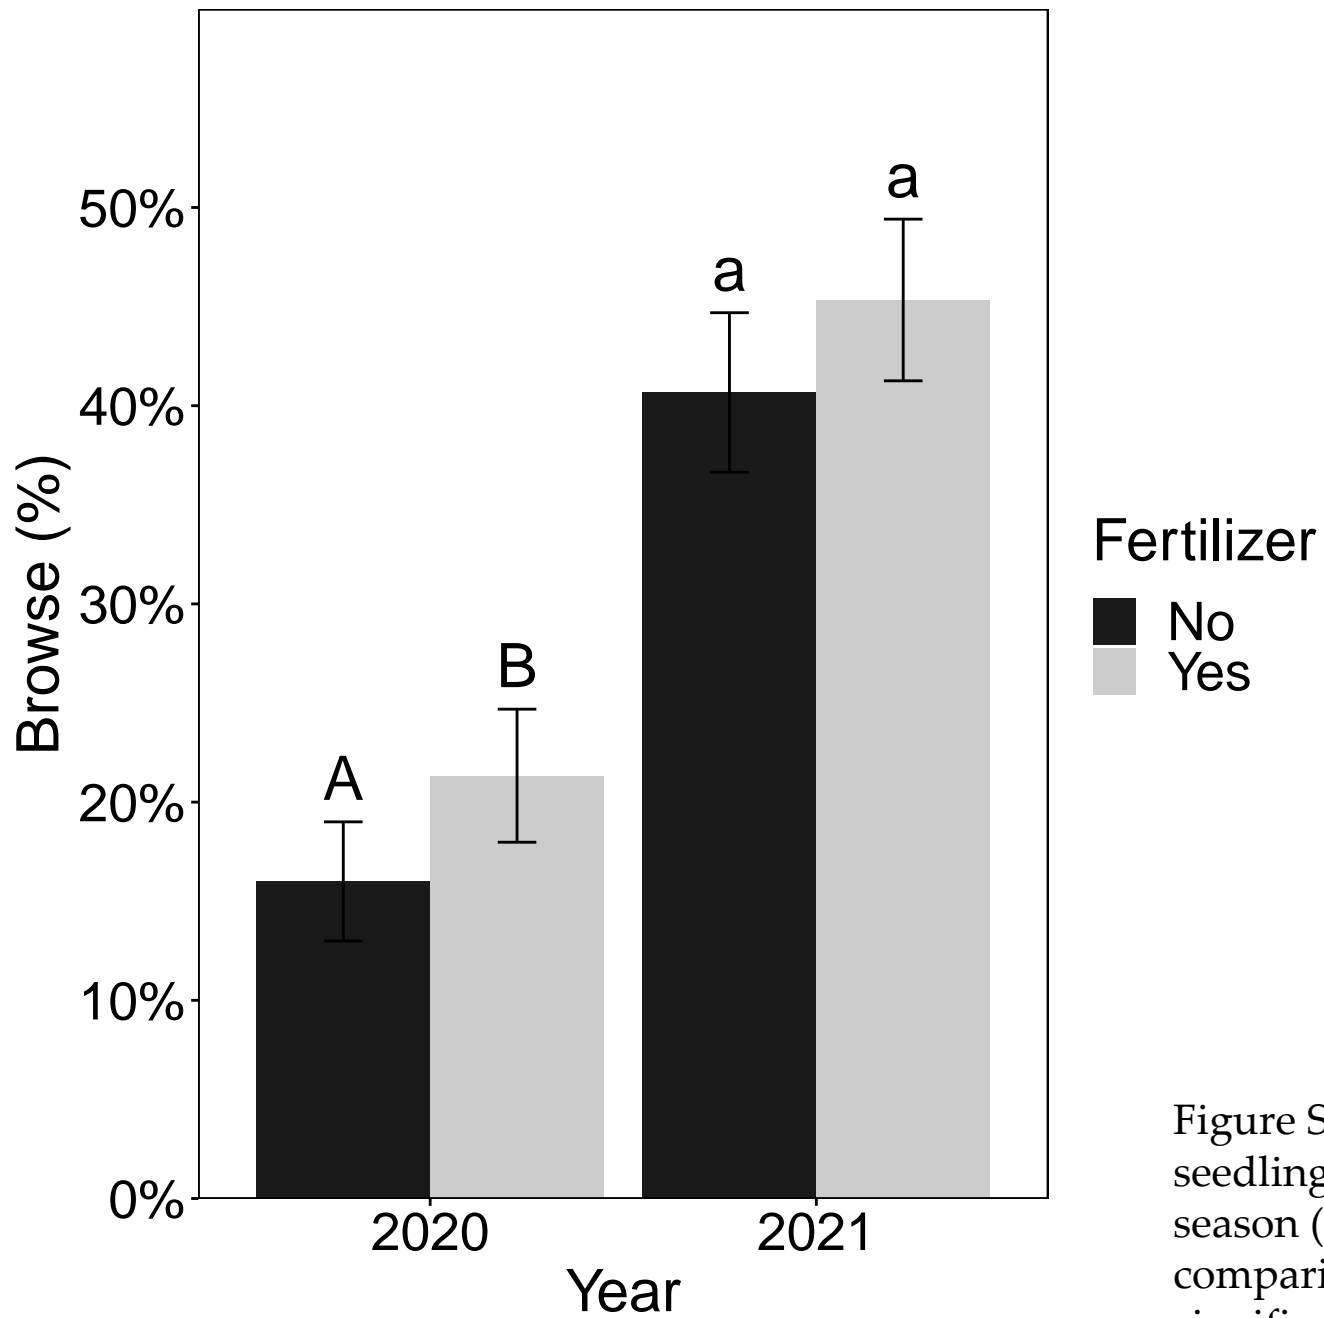

Figure S3. Percent browse (%) of fertilized and non-fertilized seedlings after the first growing season (2020) and second growing season (2021). Different letters (uppercase letters for 2020 comparisons and lowercase letters for 2021 comparisons) indicate significant differences among the shelter treatment levels ( $\alpha = 0.05$ ).
